# Supplementary material
Source: MDPI journal article supplement (https://www.mdpi.com/2673-4133/3/1/4)
Supplement: s1 [file s1]

## Supplementary materials

# Plant diversity is more important than climate factors in driving insect richness pattern along a latitudinal gradient

Jie Gao <sup>1,2</sup> and Xing Zhang <sup>3,\*</sup>

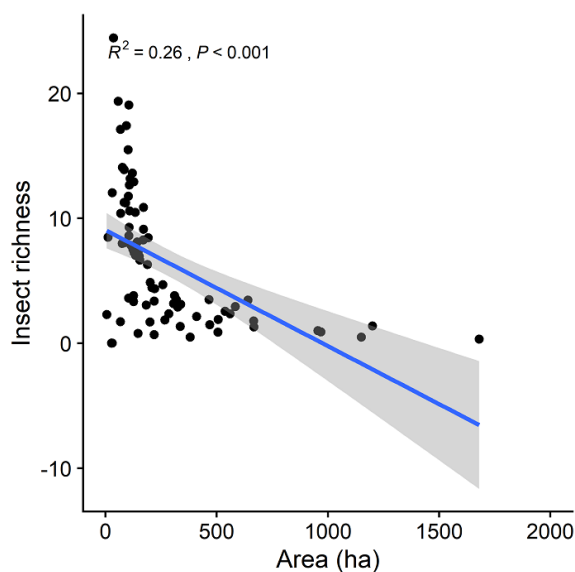

Figure S1. Relationships between area (ha) and insect richness.  $R^2$  was used to estimate the explanatory power of the regression models.

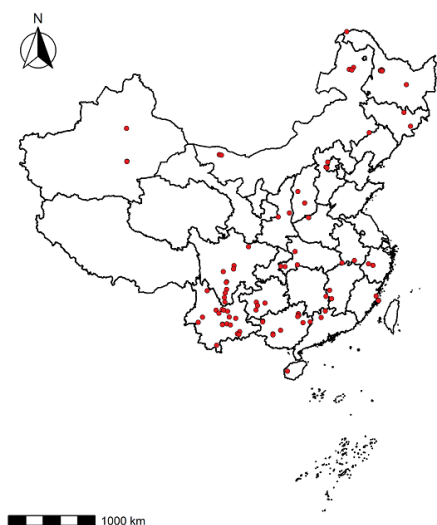

Figure S2. Study points.

Table S1. The studied areas.

| National Nature Reserves | Year Surveyed | Longitude | Latitude | Area (km <sup>2</sup> ) |
|--------------------------|---------------|-----------|----------|-------------------------|
| Baagongshan              | 1984          | 29.5      | 109.9    | 449                     |
| Baishilizi               | 1998          | 40.5      | 124.5    | 74.67                   |
| Caohai                   | 2005          | 26.8      | 104.2    | 120                     |
| Dawei Mountain           | 1999          | 23        | 104      | 457.03                  |
| Dawuling forest area     | 2012          | 22.3      | 111.2    | 35.34                   |
| Dong Zhai                | 1996          | 32        | 114      | 468                     |
| Longxi                   | 2002          | 31.2      | 103.5    | 310                     |
| Fanjing                  | 1982          | 27.9      | 108.8    | 410                     |
| Foping                   | 2006          | 33.7      | 107.8    | 292.4                   |
| Extra Arid Desert        | 2014          | 40        | 94.8     | 8000                    |
| Westlake                 | 2010          | 40        | 93       | 6634                    |
| Tao River                | 2006          | 34.4      | 103      | 2877.59                 |
| Gaoligongshan            | 1998          | 26.2      | 98.7     | 1200                    |
| Guniujiang               | 2006          | 30.1      | 117.8    | 67.13                   |
| Gudou Mountain           | 2017          | 22.2      | 113      | 110                     |
| Nanling                  | 1993          | 24.7      | 113      | 538                     |

|                             |      |      |       |         |
|-----------------------------|------|------|-------|---------|
| Neilingding Island          | 2000 | 22.4 | 113.8 | 4.95    |
| Xiangtau Mountain           | 2003 | 23.3 | 114.4 | 106.97  |
| Daming Mountain             | 2010 | 23.4 | 108.6 | 169.94  |
| Huaping forest area         | 2008 | 25.6 | 109.9 | 147     |
| Nong Gang                   | 2003 | 22.4 | 106.9 | 101     |
| Ichang Orchidaceae          | 2012 | 24.8 | 106.3 | 220.62  |
| Kanas                       | 1989 | 48.9 | 87.4  | 2500    |
| Jianfengling                | 2001 | 18.6 | 108.9 | 640     |
| Yinggeling                  | 2012 | 19   | 109.4 | 505.33  |
| Sea tutuo                   | 2014 | 40.6 | 115.8 | 126.34  |
| Red pine depression         | 2005 | 42.3 | 117.4 | 73      |
| Dabie Mountain              | 2012 | 31.8 | 115.5 | 106     |
| Heilongjiang South          | 1999 | 51.4 | 125.5 | 2295.23 |
| Zhalong                     | 2005 | 47.2 | 124.2 | 2100    |
| Hubei Back River            | 2005 | 30.1 | 110.6 | 409.65  |
| Hubei nine Gong Mountain    | 2002 | 29.4 | 114.6 | 201.05  |
| Hubei Nanhe                 | 2010 | 32   | 111.4 | 148.34  |
| Seven sisters               | 2006 | 29.9 | 109.7 | 345.5   |
| Zhangzhou and Heyuan        | 2008 | 29   | 111   | 102.66  |
| Taoyuan Hunan lingsien hole | 1993 | 26.8 | 113.6 | 50      |
| Six step brook              | 2005 | 28.4 | 110.9 | 142.4   |
| Hunan Xiaoxi                | 2000 | 28.8 | 110.3 | 218.15  |
| Yanling Taoyuan Hunan cave  | 2001 | 26.5 | 114.1 | 1132    |

|                        |      |      |       |         |
|------------------------|------|------|-------|---------|
| The great Jia River    | 2002 | 46.9 | 133.6 | 726.04  |
| Hunchun                | 2002 | 43.1 | 130.8 | 1087    |
| Jiangsu Dafeng elk     | 1998 | 32.9 | 120.9 | 26.68   |
| Jiangxi ganjianyuan    | 2013 | 26.3 | 116.4 | 158.26  |
| Jiangxi nine Mountain  | 2009 | 28.9 | 115.5 | 115.41  |
| Tao Hong Ling, Jiangxi | 2004 | 29.8 | 116.6 | 125     |
| Jinggangshan           | 1998 | 26.5 | 114.1 | 207     |
| Shi Na Si              | 1996 | 48.9 | 87.3  | 2202    |
| Wide water forest area | 2004 | 28.2 | 107.1 | 218.4   |
| Lancang River          | 2012 | 24.1 | 99.8  | 955.16  |
| Old snake flush        | 2003 | 26.5 | 107.4 | 93.07   |
| Leigong Mountain       | 1989 | 26.4 | 108.2 | 473     |
| Liaoning Xian Man Cave | 2002 | 40   | 123   | 35.75   |
| Six Panshan reserve    | 2013 | 35.5 | 106.3 | 968     |
| Mayang River           | 2015 | 28.8 | 108.2 | 311.13  |
| Peony peak             | 1992 | 44.4 | 129.8 | 194.68  |
| Mulan Wei Chang        | 2005 | 41.9 | 116.9 | 506.37  |
| Southern Dongting Lake | 1994 | 28.8 | 112.6 | 1680    |
| South China Zhongshan  | 1989 | 24.5 | 100.9 | 112.23  |
| Nanji Islands          | 2000 | 27.5 | 120   | 11.13   |
| Dali Noel              | 2017 | 43.3 | 116.7 | 1194.14 |

|                                                  |      |      |       |         |
|--------------------------------------------------|------|------|-------|---------|
| Inner Mongolia Honghuaerji<br>sylvestris Forest  | 2001 | 47.9 | 122.4 | 200     |
| Ningxia Baijitan                                 | 1992 | 38.1 | 106.5 | 818     |
| Helan mountain protection area in<br>Ningxia     | 2011 | 38.8 | 106.2 | 1935    |
| Heilongjiang nun River                           | 2001 | 46.9 | 133.3 | 1605.95 |
| Qinghai Chaidamu Haloxylon<br>ammodendron Forest | 2004 | 36.7 | 96.4  | 3105    |
| Qilian Mountains                                 | 2007 | 38.1 | 100.6 | 68.06   |
| Qinglong River                                   | 2013 | 40.8 | 119   | 699.12  |
| Pang Quan gully, Shanxi                          | 2014 | 37.8 | 111.5 | 104.44  |
| Shedao LaoTieShan reserve                        | 2016 | 39   | 121   | 145.95  |
| Shennongjia                                      | 2015 | 31.5 | 110.3 | 704.67  |
| Baoding Mountain                                 | 2008 | 32.5 | 104.1 | 636.15  |
| Xiaolongshan                                     | 2012 | 34.3 | 106   | 319.38  |
| Arhorchin                                        | 2015 | 44.1 | 120.3 | 1372.98 |
| Matau Mountain                                   | 2006 | 27.5 | 117.1 | 5800    |
| Wuyi Mountain                                    | 2001 | 27.4 | 117.8 | 53.6    |
| Qiyun Mountain                                   | 2010 | 25.5 | 113.8 | 242.767 |
| Tongbo Mountain                                  | 1998 | 28.1 | 118.2 | 4551    |
| Lu Mountain                                      | 2010 | 29.3 | 115.8 | 1665.7  |
| Kunyu Mountain                                   | 2002 | 37.1 | 121.4 | 224.23  |
| Small Qinling Mountains                          | 2004 | 34.3 | 110.3 | 380     |

|                    |      |      |       |        |
|--------------------|------|------|-------|--------|
| Funiu Mountain     | 1994 | 33.5 | 112.5 | 134.35 |
| Berman mountain    | 1994 | 33.3 | 111.9 | 143.36 |
| Lian Kang Mountain | 2009 | 31.3 | 114.5 | 75.45  |

---
